# Supplementary material for: Stromal Progenitor Cells from Endogenous Adipose Tissue Contribute to Pericytes and Adipocytes That Populate the Tumor Microenvironment
Source: Oxford University Press journal article supplement (doi:10.1158/0008-5472.can-12-0294), 2012-10-14
Supplement: 00085472can120294-sup-f5_146k.pdf [file 00085472can120294-sup-f5_146k.pdf]

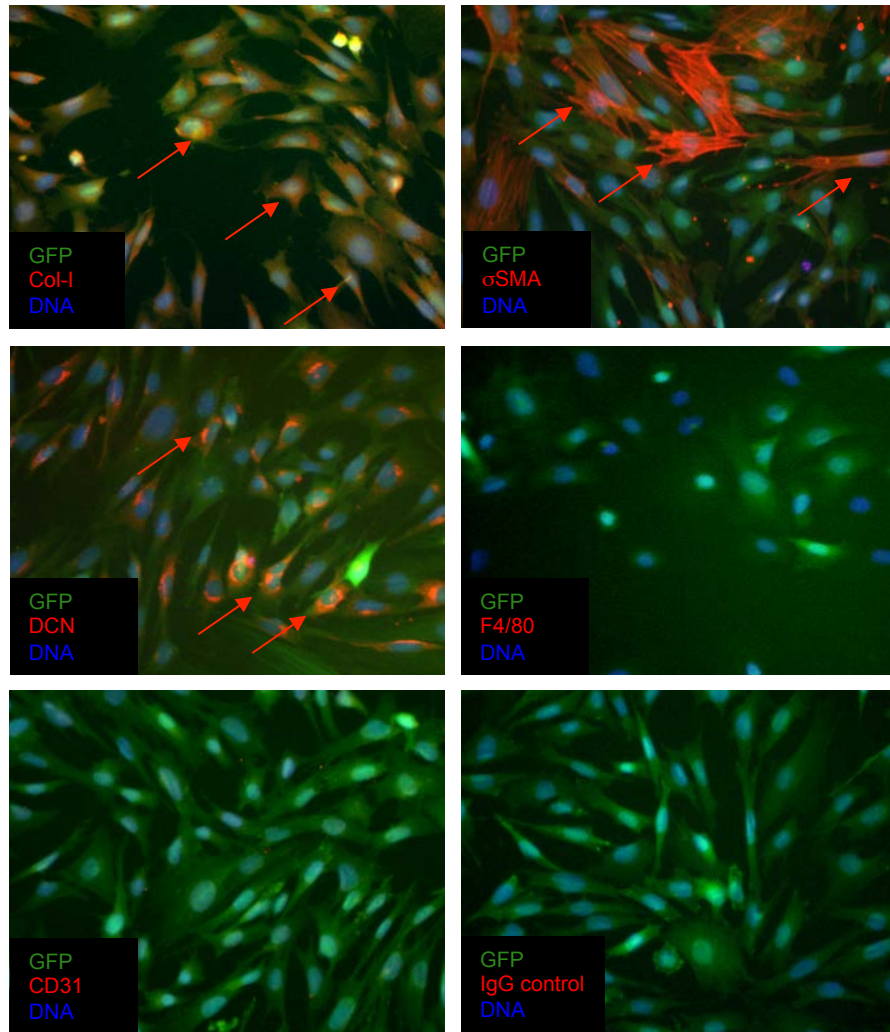

**Figure S5.** Characterization of circulating CFU-F. Adherent GFP+CD31-CD45-CD34+ cells recovered from PBMC of obese tumor-bearing GFP/RFP chimeras were allowed to expand in culture. Then cells were fixed, permeabilized and subjected to immunofluorescence analysis with rabbit anti-collagen I (Abcam), rat anti- $\alpha$ SMA (Sigma), rabbit anti-decorin and rat anti-F4/80 (Abcam) antibodies or IgG negative control. Secondary Cy-3-conjugated antibody signal is red. Nuclei are blue.
